# Supplementary material for: Facile solution synthesis of FeNx atom clusters supported on nitrogen-enriched graphene carbon aerogels with superb electrocatalytic performance toward the oxygen reduction reaction
Source: Royal Society of Chemistry journal article supplement (doi:10.1039/c9ta09104a), 2019-01-01
Supplement: c9ta09104a1.pdf [file c9ta09104a1.pdf]

Supplementary Information

**Facile solution synthesis of FeN<sub>x</sub> atom clusters supported on  
nitrogen-enriched graphene carbon aerogel with superb  
electrocatalytic performance toward oxygen reduction reaction**

*MinHong, JianhangNie, Xiaohua Zhang\*, Pengfei Zhang, QinMeng, Junlin Huang,*

*Zhenyang Xu, Cuicui Du\* and Jinhua Chen\**

*State Key Laboratory of Chemo/Biosensing and Chemometrics*

*College of Chemistry and Chemical Engineering*

*Hunan University*

*Changsha 410082, P.R. China*

*E-mail: mickyxie@hnu.edu.cn, (X.H. Zhang), ducc@hnu.edu.cn (C.C.Dui),*

*chenjinhua@hnu.edu.cn (J.H. Chen)*

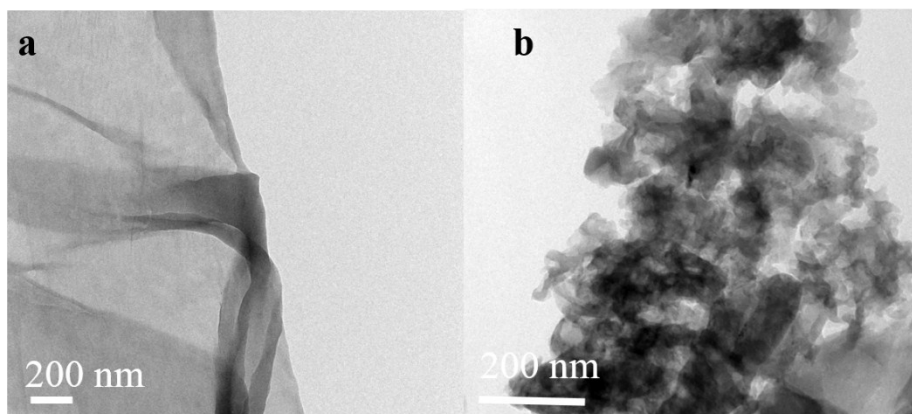

**Fig. S1** TEM images of GO (a) and g-C<sub>3</sub>N<sub>4</sub>(b)

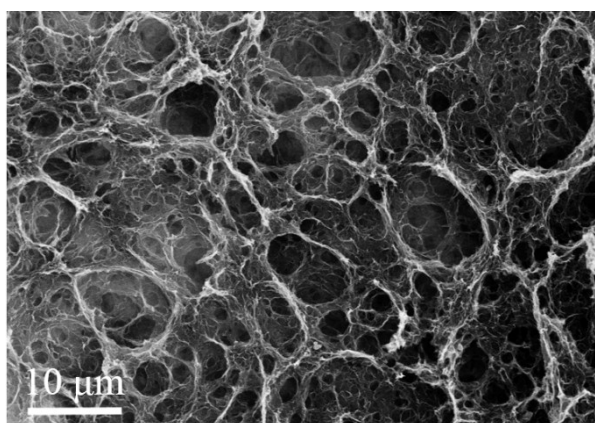

**Fig. S2** SEM images of FePc-gC<sub>3</sub>N<sub>4</sub>/g-GEL

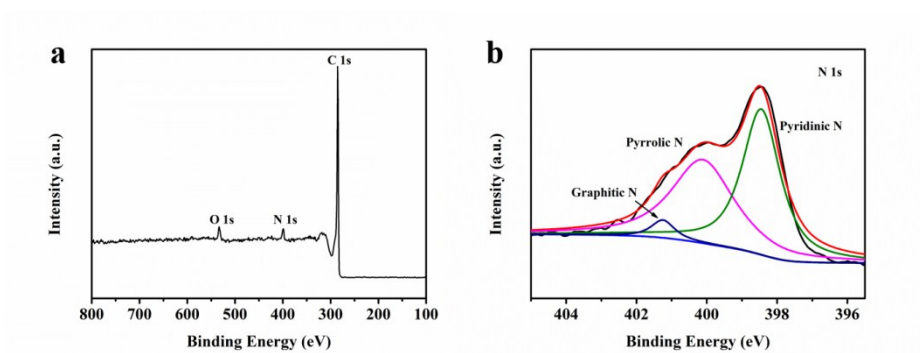

**Fig. S3** XPS survey spectrum (a) and N 1s high resolution spectra (b) of CN/g-GEL.

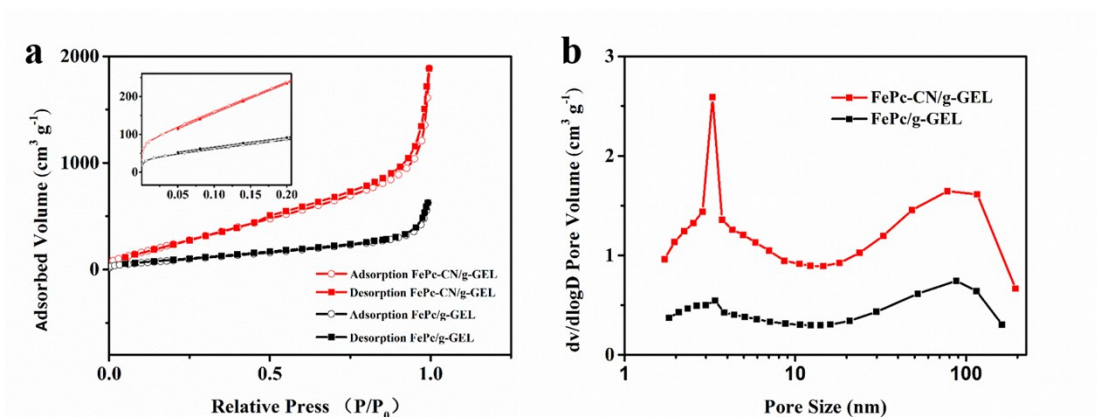

**Fig.S4**(a) N<sub>2</sub> sorption-desorption isotherms of FeNx-CN/g-GEL and FeNx/g-GEL. (b) Pore size distribution curves of FeNx-CN/g-GEL and FeNx/g-GEL

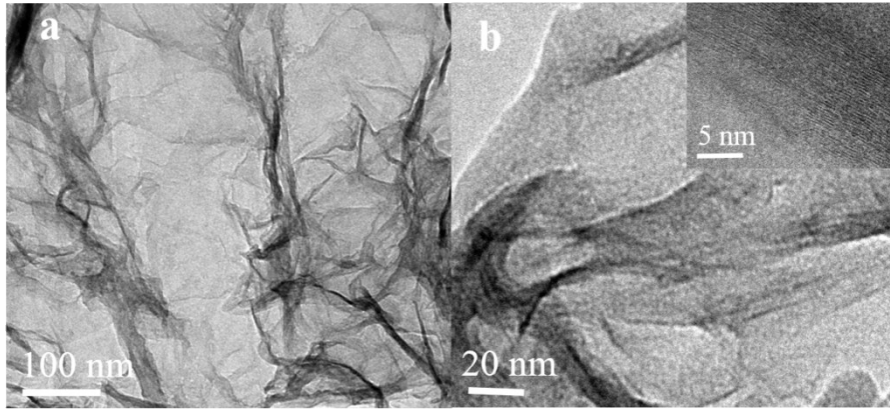

**Fig. S5**TEM images (a, b) and HRTEM image (the inset in Fig. S5b) of FeNx-CN/g-GEL after chronoamperometric test

**Table S1** Summary of various previous reported non-platinum catalysts for ORR in 0.1 M KOH alkaline solutions.

| Electrocatalysts                      | $E_{\text{onset}}/V$ vs RHE | $E_{1/2}/V$ vs RHE | Reference |
|---------------------------------------|-----------------------------|--------------------|-----------|
| FeN <sub>x</sub> -CN/g-GEL            | 1.0                         | 0.90               | This work |
| CoN-doped-CNT                         | 0.87                        | 0.81               | 1         |
| Fe-Fe <sub>3</sub> C@Fe-N-C           | 0.97                        | 0.88               | 2         |
| Co/N-RGO                              | ----                        | 0.896              | 3         |
| Co@NHCC                               | 0.938                       | 0.837              | 4         |
| NiN-dopedMG                           | 1.0                         | 0.85               | 5         |
| Cu-Co <sub>2</sub> P@2D-NPC           | 0.95                        | 0.835              | 6         |
| Atomic FeN <sub>x</sub> -embedded PNC | 0.997                       | 0.86               | 7         |
| Atomic Fe-NSDC                        | 0.96                        | 0.84               | 8         |
| Atomic Fe-N-C HNSs                    | 1.046                       | 0.87               | 9         |
| Atomic Co-N-C@F127                    | 0.93                        | 0.84               | 10        |
| Atomic Fe-dopedZIF                    | ----                        | 0.864              | 11        |
| Fe-N <sub>4</sub> SAs/NPC             | 0.972                       | 0.885              | 12        |
| Co-SAS/HOPNC                          | ----                        | 0.892              | 13        |
| Atomic Fe-N <sub>x</sub> /HGPC        | ----                        | 0.845              | 14        |

## References

1. L. Zuozhong, F. Xing, L. Haitao, Q. Jing, L. Youyong, G. Jinpeng, H. Meiling, Y. Haitao, Z. Wei and L. Haiping, *Angew. Chemie., Int. Ed.*, 2018,**7**, 854.
2. H. Wang, F. X. Yin, N. Liu, R. H. Kou, X. B. He, C. J. Sun, B. H. Chen, D. J. Liu and H. Q. Yin, *Adv. Funct. Mater.*, 2019, **29**, 1901531.

3. T. Zhou, W. Xu, N. Zhang, Z. Du, C. Zhong, W. Yan, H. Ju, W. Chu, H. Jiang, C. Wu and Y. Xie, *Adv. mater.*, 2019, **31**, e1807468.
4. J. Wu, L. Hu, N. Wang, Y. Li, D. Zhao, L. Li, X. Peng, Z. Cui, L.-J. Ma, Y. Tian and X. Wang, *Appl. Catal., B*, 2019, **254**, 55-65.
5. J. Han, G. Huang, Z. Wang, Z. Lu, J. Du, H. Kashani and M. Chen, *Adv. mater.*, 2018, **30**, e1803588.
6. C. He, L. Diao, T. Yang, B. Chen, B. Zhang, N. Zhao, C. Shi, E. Liu and L. Ma, *J. Mater. Chem. A*, 2019, **8**
7. L. Ma, S. Chen, Z. Pei, Y. Huang, G. Liang, F. Mo, Q. Yang, J. Su, Y. Gao, J. A. Zapien and C. Zhi, *ACS nano*, 2018, **12**, 1949-1958.
8. J. Zhang, M. Zhang, Y. Zeng, J. Chen, L. Qiu, H. Zhou, C. Sun, Y. Yu, C. Zhu and Z. Zhu, *Small*, 2019, **15**, e1900307.
9. Y. Chen, Z. Li, Y. Zhu, D. Sun, X. Liu, L. Xu and Y. Tang, *Adv. mater.*, 2019, **31**, e1806312.
10. Y. He, S. Hwang, D. A. Cullen, M. A. Uddin, L. Langhorst, B. Li, S. Karakalos, A. J. Kropf, E. C. Wegener, J. Sokolowski, M. Chen, D. Myers, D. Su, K. L. More, G. Wang, S. Litster and G. Wu, *Energy Environ.Sci.*, 2019, **12**, 250-260.
11. Y. Deng, B. Chi, J. Li, G. Wang, L. Zheng, X. Shi, Z. Cui, L. Du, S. Liao, K. Zang, J. Luo, Y. Hu and X. Sun, *Adv. Energy Mater.*, 2019, **9**, 1802856.
12. Y. Pan, S. Liu, K. Sun, X. Chen, B. Wang, K. Wu, X. Cao, W.-C. Cheong, R. Shen, A. Han, Z. Chen, L. Zheng, J. Luo, Y. Lin, Y. Liu, D. Wang, Q. Peng, Q. Zhang, C. Chen and Y. Li, *Angew. Chemie., Int. Ed.*, 2018, **57**, 8614-8618.
13. T. Sun, S. Zhao, W. Chen, D. Zhai, J. Dong, Y. Wang, S. Zhang, A. Han, L. Gu, R. Yu, X. Wen, H. Ren, L. Xu, C. Chen, Q. Peng, D. Wang and Y. Li, *Proc. Natl. Acad. Sci.*, 2018, **115**, 12692-12697.
14. Y. Deng, B. Chi, X. Tian, Z. Cui, E. Liu, Q. Jia, W. Fan, G. Wang, D. Dang, M. Li, K. Zang, J. Luo, Y. Hu, S. Liao, X. Sun and S. Mukerjee, *J. Mater. Chem. A*, 2019, **7**, 5020-5030.
